# Supplementary material
Source: MDPI journal article supplement (https://www.mdpi.com/2073-4441/16/10/1435)
Supplement: s1 [file s1]

# The Occurrence, Distribution, Environmental Effects, and Interactions of Microplastics and Antibiotics in the Aquatic Environment of China

Yiping Guo <sup>1</sup>, Wanfei Shao <sup>1</sup>, Weigao Zhao <sup>2,3,\*</sup> and Hong Zhu <sup>4</sup>

<sup>1</sup> School of Environmental and Municipal Engineering, North China University of Water Resources and Electric Power, Zhengzhou 450046, China; guoyiping@ncwu.edu.cn (Y.G.); shaowanfei@tju.edu.cn (W.S.)

<sup>2</sup> Department of Environmental Engineering, School of Environmental Science and Engineering, Tianjin University, Tianjin 300072, China

<sup>3</sup> State Key Laboratory of Pollution Control and Resource Reuse, School of the Environment, Nanjing University, Nanjing 210023, China

<sup>4</sup> Tianjin Hydrology and Water Resources Management Center, Tianjin 300060, China; shiyuanyu1980@163.com

\* Correspondence: zhaoweigao@tju.edu.cn; Tel.: +86-22-87402072

**Citation:** Guo, Y.; Shao, W.; Zhao, W.; Zhu, H. The Occurrence, Distribution, Environmental Effects, and Interactions of Microplastics and Antibiotics in the Aquatic Environment of China. *Water* **2024**, *16*, 1435. <https://doi.org/10.3390/w16101435>

Academic Editor: Daniel Mamais

Received: 25 March 2024

Revised: 23 April 2024

Accepted: 4 May 2024

Published: 17 May 2024

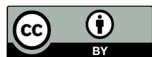

**Copyright:** © 2024 by the authors. Licensee MDPI, Basel, Switzerland. This article is an open access article distributed under the terms and conditions of the Creative Commons Attribution (CC BY) license (<https://creativecommons.org/licenses/by/4.0/>).

## Supplementary materials

Table S1. Physical and chemical properties of common microplastics in aquatic environment.

| MPs                              | Molecule Structure                                                                  | General formula                                               | Polarity characteristic | point of zero charge | Density (g/cm <sup>3</sup> ) |
|----------------------------------|-------------------------------------------------------------------------------------|---------------------------------------------------------------|-------------------------|----------------------|------------------------------|
| Polyethylene terephthalate (PET) | 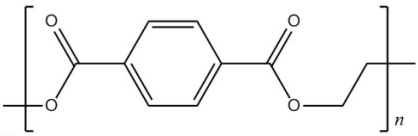   | (C <sub>10</sub> H <sub>8</sub> O <sub>4</sub> ) <sub>n</sub> | Polarity                | -                    | 1.30–1.50                    |
| polystyrene (PS)                 |   | (C <sub>8</sub> H <sub>8</sub> ) <sub>n</sub>                 | Weak polarity           | 6.69                 | 1.04–1.50                    |
| polypropylene (PP)               |  | (C <sub>3</sub> H <sub>6</sub> ) <sub>n</sub>                 | Nonpolarity             | 6.76                 | 0.88–1.23                    |
| polyethylene (PE)                |  | (C <sub>2</sub> H <sub>4</sub> ) <sub>n</sub>                 | Nonpolarity             | 6.63                 | 0.92–0.97                    |
| polyvinyl chloride (PVC)         |  | (C <sub>2</sub> H <sub>3</sub> Cl) <sub>n</sub>               | Polarity                | 6.65                 | 1.15–1.70                    |
| polyamide (PA)                   |  | -                                                             | Polarity                | 6.52                 | 1.12–1.14                    |
| Polycaprolactone (PCL)           |  | (C <sub>6</sub> H <sub>10</sub> O <sub>2</sub> ) <sub>n</sub> | Polarity                | -                    | 1.145                        |

**Table S2.** Abundance of microplastics in rivers, oceans, and lakes in China.

| Study area                      | Water body                                  | Sediment                 | Particle size                                                                   | Dominant type                           | Dominant colors                                                          | Shape                                                             | Collection device (Mesh size)                | Reference |
|---------------------------------|---------------------------------------------|--------------------------|---------------------------------------------------------------------------------|-----------------------------------------|--------------------------------------------------------------------------|-------------------------------------------------------------------|----------------------------------------------|-----------|
| The bohai sea                   | 0.33±0.34 particles/m <sup>3</sup>          | -                        | >2.5 cm, 7%<br>0.5–2.5 cm, 38%<br>0.03–0.5 cm, 55%                              | PE, PP, PS, PET                         | White, yellow, transparent, green, blue, red, black                      | Irregular fragments, lines and films account for 46%, 24% and 22% | 330 mm trawling net                          | [1]       |
| South China Sea                 | 0.045±0.093 particles/m <sup>3</sup>        | -                        | <0.3 mm, 92%                                                                    | PES, PE, PP                             | -                                                                        | -                                                                 | Bongo net (333 µm mesh nylon plank ton nets) | [2]       |
| Northern Yellow Sea             | 545±282 particles/m <sup>3</sup>            | 37±42.7 particles/kg     | <0.5 mm, 35.7%–96.6%                                                            | PE, PP, Poly (ethyl acrylate) copolymer | Transparent, color, black, white                                         | Mainly film and fiber                                             | 30 µm steel sieve                            | [3]       |
| South Yellow Sea/East China Sea | -                                           | 134±6 particles/kg       | less than 1000 µm, 89%<br>60–200 µm, 32%<br>200–500 µm, 31%<br>500–1000 µm, 26% | PE, PET, PES                            | Blue (35%) and transparent (29%), black, white, red and yellow particles | Fiber (77%), fragment (17%), film (5%) and particle (1%)          | a box corer                                  | [4]       |
| Dongting Lake                   | 900~2800 n/m <sup>3</sup>                   | -                        | <330 µm, >20%                                                                   | PE, PP                                  | Transparent (28.7%), blue, red, purple, black                            | Fiber type, particle type and film type                           | Stainless steel screen size 50 µm            | [5]       |
| Honghu Lake                     | 1250~4650 n/m <sup>3</sup>                  | -                        | <330 µm, >20%                                                                   | PE, PP                                  | Transparent (22.1%), blue, black, red                                    | Fiber type, particle type and film type                           | Stainless steel screen size 50 microns       | [5]       |
| Three Gorges Reservoir          | 1597~12611 n/m <sup>3</sup>                 | 25-300 n/kg              | < 1mm, 79.8%                                                                    | PS, PP, PE                              | Transparent, white, blue, red, green                                     | Fiber, fragment, particle, film and polystyrene foam              | 48µm stainless steel sieve                   | [6]       |
| Changjiang Estuary              | -                                           | 20~340 particles/kg      | 46.8 –4968.7 µm                                                                 | RY, PES, PET, PP, PE, PS                | Transparent (42%), blue 25% and black 16%                                | Fiber (93%). Fragments (6%) and particles (1%)                    | -                                            | [7]       |
| Yangtze River                   | 500~3100 n/m <sup>3</sup>                   | -                        | 0.021–4.83 mm                                                                   | -                                       | -                                                                        | -                                                                 | The filter aperture is 0.45 mm               | [8]       |
| Qinghai Lake                    | 5000~75800 n/km <sup>2</sup>                | 50~1292 n/m <sup>2</sup> | -                                                                               | PP, PE, PS, PET                         | Mainly transparent                                                       | Fiber, chips and foam                                             | 112 mm mesh size                             | [9]       |
| Weihe River                     | 3060~10700 n/m <sup>3</sup>                 | 360~1320 particles/kg    | <0.5 mm, 40.8%–68.8%<br>0.5–1 mm, 8.35–27.1%                                    | -                                       | -                                                                        | Fibers, fragments, particles, films and foams                     | 0.45 µm filter paper suction                 | [10]      |
| Wuhan urban lakes and rivers    | 1660±639~8925±1591 particles/m <sup>3</sup> | -                        | -                                                                               | PET, PP, PE, PA, PS                     | Transparency 24.7%                                                       | Fiber 52.9% to 95.6%, film and particle                           | 0.45 µm glass microfiber filter paper        | [11]      |
| Changjiang Estuary              | 4137±2461 particles/m <sup>3</sup>          | -                        | 0.5–5 mm, >90%                                                                  | -                                       | Mostly transparent and colorful                                          | Fiber, particles and films                                        | -                                            | [12]      |

| Study area                                         | Water body                   | Sediment                           | Particle size                     | Dominant type        | Dominant colors                                                | Shape                                           | Collection device (Mesh size)                   | Reference |
|----------------------------------------------------|------------------------------|------------------------------------|-----------------------------------|----------------------|----------------------------------------------------------------|-------------------------------------------------|-------------------------------------------------|-----------|
| Guangzhou Zhujiang                                 | 379~7924 n/m <sup>3</sup>    | 80~9579 particles/kg               | 0.02–1 mm (44.8%, 1–2 mm (36.5%)) | PE, PP               | White (65.6%), black, blue, red, yellow, green and transparent | Fiber (80.9%), fragment (18.9%) and film (2.2%) | 5 µm Membrane filter                            | [13]      |
| The minjiang river                                 | 1245±531.5 n/m <sup>3</sup>  | -                                  | <2mm, >70%                        | PP, PE               | Colored, black or transparent                                  | Fibers and particles                            | Sartorius filter (47 mm, 1.2–mm pore size)      | [14]      |
| Jiaojiang                                          | 955±848 n/m <sup>3</sup>     | -                                  | -                                 | -                    | -                                                              | -                                               | Sartorius filter (47 mm, 1.2-mm pore size)      | [14]      |
| River ou                                           | 680.0±284.6 n/m <sup>3</sup> | -                                  | -                                 | -                    | -                                                              | -                                               | Sartorius filter (47 mm, 1.2-mm pore size)      | [14]      |
| Four lakes in the Silingcuo basin, northern Tibet  | -                            | 8±14~563±1219 items/m <sup>2</sup> | 1–5 mm is the most abundant       | PE, PP, PS, PET, PVC | -                                                              | Sheets, lines, foams, fragments                 | 1 mm mesh size sieves                           | [15]      |
| ShaPaWan                                           | -                            | 5020 n/kg                          | -                                 | -                    | -                                                              | -                                               | -                                               | [16]      |
| Haikou                                             | -                            | 7940 n/kg                          | -                                 | -                    | -                                                              | -                                               | -                                               | [16]      |
| Wanning                                            | -                            | 8720 n/kg                          | -                                 | -                    | -                                                              | -                                               | -                                               | [16]      |
| Sanya                                              | -                            | 6880 n/kg                          | -                                 | -                    | -                                                              | -                                               | -                                               | [16]      |
| The north sea                                      | -                            | 6080 n/kg                          | -                                 | -                    | -                                                              | -                                               | -                                               | [16]      |
| Yulin River                                        | 13~360 n/m <sup>3</sup>      | -                                  | 64–100 µm, 41.4%–69.0%            | PE, PP, PS           | -                                                              | Fiber and foam                                  | PCTE filters (10 mm pore size)                  | [17]      |
| Qinghai Tibet Plateau lakes                        | 624±411 items/m <sup>3</sup> | 41±22 items/kg                     | 100–250 µm, 28%–29%               | PP, PE, PS, PET, PVC | Transparent, white, gray, green, black, blue, yellow           | Fiber, film, fragment, foam and sphere          | GF/C filter (0.45 µm pore size, 47 mm diameter) | [18]      |
| Buqu River (the source of the Yangtze river)       | 967±141 items/m <sup>3</sup> | 130±71 items/kg                    | -                                 | PET, PE, PP, PS, PA  | Transparent, blue, black, white, red and green                 | Fiber, fragment, pellet                         | Stainless steel sieve (0.045 mm)                | [19]      |
| Naqu River (the upper part of the Nujiang River),  | 817±589 items/m <sup>3</sup> | 50±7 items/kg                      | -                                 | PET, PE, PP, PS, PA  | Transparent, blue, black, white, red and green                 | Fiber, fragment, pellet                         | Stainless steel sieve (0.045 mm)                | [19]      |
| Lhasa River (a tributary of the Brahmaputra River) | 683±354 items/m <sup>3</sup> | 180±42 items/kg                    | -                                 | PET, PE, PP, PS, PA  | Transparent, blue, black, white, red and green                 | Fiber, fragment, pellet                         | Stainless steel sieve (0.045 mm)                | [19]      |
| Brahmaputra River,                                 | 483±118 items/m <sup>3</sup> | 65±21 items/kg                     | -                                 | PET, PE, PP, PS, PA  | Transparent, blue, black, white, red and green                 | Fiber, fragment, pellet                         | Stainless steel sieve (0.045 mm)                | [19]      |
| Nyang River                                        | 517±24 items/m <sup>3</sup>  | 90±14 items/kg                     | -                                 | PET, PE, PP, PS, PA  | Transparent, blue, black, white, red and green                 | Fiber, fragment, pellet                         | Stainless steel sieve (0.045 mm)                | [19]      |

| Study area                         | Water body                          | Sediment            | Particle size                                           | Dominant type            | Dominant colors                                              | Shape                                                                    | Collection device (Mesh size)    | Reference |
|------------------------------------|-------------------------------------|---------------------|---------------------------------------------------------|--------------------------|--------------------------------------------------------------|--------------------------------------------------------------------------|----------------------------------|-----------|
| Fenghua River                      | 300~4000 particles/m <sup>3</sup>   | -                   | <0.5 mm mostly                                          | PP, PE, copolymer        | Transparent, blue, white, black                              | Fiber (38–89%), fragment (4–56%), film (0–33%) and particle/foam (0–11%) | Stainless steel sieve (0.063 mm) | [20]      |
| Xiangxi River                      | 0.055~34 particles/m <sup>3</sup>   | -                   | -                                                       | PE, PP, PS               | -                                                            | Sheet, fragment, foam                                                    | Trawl net (112 µm)               | [21]      |
| Chishui River                      | 1770~14330 particles/m <sup>3</sup> | -                   | 500 ~ 1000 µm (63.9%)                                   | PE, PP, PS, PVC          | White (including transparent) (41.3%) and multicolor (44.1%) | Fiber, fragment, foam, film                                              | Mesh screen (75 µm)              | [22]      |
| Taihu basin Rivers                 | 1800~18200 particles/m <sup>3</sup> | -                   | -                                                       | PVC, PE                  | -                                                            | Fragment, fiber, film, pellet                                            | Mesh screen (53 µm)              | [23]      |
| Poyang Lake                        | 5000~34000 particles/m <sup>3</sup> | 54~506 items/kg     | -                                                       | PP, PE, PVC, nylon       | White, Black, Color, and Transparent                         | Fiber, fragment, film                                                    | Stainless steel sieve (50 µm)    | [24]      |
| Wuliangsuha i Lake                 | 3120~11250 particles/m <sup>3</sup> | -                   | -                                                       | PS, PP, PE, PVC          | -                                                            | Fiber, pellet, fragment, film                                            | Stainless steel sieve (75 µm)    | [25]      |
| Daliao River                       | 475 n/m <sup>3</sup>                | -                   | 1–1.5 mm, 19.77%<br>1.5–2 mm, 19.50%<br><2.5 mm, 70.65% | -                        | Colorless, 57.28%                                            | PE, 74.53%                                                               | -                                | [26]      |
| Dianchi Lake                       | 130 n/m <sup>3</sup>                | 476 items/kg        | -                                                       | PET, PP, PE, PVC, PA     | Mainly blue and transparent                                  | Stripe dominated                                                         | -                                | [23]      |
| Nansihu Lake                       | 3420±2890 n/m <sup>3</sup>          | 266±225.70 items/kg | -                                                       | PP, PET, PE              | Blue, grey, black and transparent                            | Fiber based                                                              | -                                | [27]      |
| Lower Yellow River and its estuary | 65400~93200 n/m <sup>3</sup>        | -                   | 50–200 µm                                               | PE, PP, PS, PET          | -                                                            | Fiber, floc, fragment, small ball, film                                  | -                                | [28]      |
| Ganjiang River                     | 200~5400 n/m <sup>3</sup>           | 228~247 items/kg    | Mainly <1 mm                                            | PE, PP, PS               | Colorful                                                     | Fiber based                                                              | -                                | [29]      |
| Qinling Weihe River                | 2300~21050 items/m <sup>3</sup>     | -                   | <500 µm, 64.3%                                          | PE, PP, PA               | -                                                            | -                                                                        | -                                | [30]      |
| Harbin Urban Inland River          | 11970~68971 items/m <sup>3</sup>    | 824~2261 items/kg   | 100–1000 µm                                             | PE, PP, PS, PA, PVC, PET | Colorless and white                                          | Fibers>Fragmen<br>ts<br>>Films>Particles                                 | -                                | [31]      |

Notes: (1) "-" indicates that the item is not covered in the literature. (2) items, n, particles, are considered as the same unit of measurement. (3) PA= polyamide, PP = polypropylene, PE = polyethylene, PS = polystyrene, PET = polyethylene terephthalate, PES = polyester, PVC = polyvinyl acetate, RY = Rayon.

**Table S3.** Physical and chemical properties of common antibiotics in aquatic environment.

| Class         | Compound         | Acronym | Molecular formula     | Structure                                                                            | Molecular mass | Log $K_{ow}$ | $pK_a$                                             | Speciation at freshwater (pH=6.7-7.1) | Speciation at seawater (pH=8.0) |
|---------------|------------------|---------|-----------------------|--------------------------------------------------------------------------------------|----------------|--------------|----------------------------------------------------|---------------------------------------|---------------------------------|
| Tetracyclines | Tetracycline     | TC      | $C_{22}H_{24}N_2O_8$  | 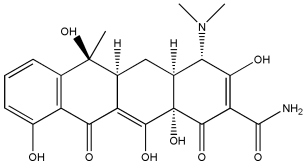   | 444.93         | 1.37         | $pK_{a1}=3.30$<br>$pK_{a2}=7.70$<br>$pK_{a3}=9.30$ | Zwitterion, Anion                     | Zwitterion, Anion               |
|               | Oxytetracycline  | OTC     | $C_{22}H_{24}N_2O_9$  |    | 460.43         | -0.90        | $pK_a=9.50$                                        | Zwitterion, Anion                     | Zwitterion, Anion               |
| Sulfonamides  | Sulfadiazine     | SDZ     | $C_{10}H_{10}N_4O_2S$ |    | 250.28         | -0.09        | $pK_a=6.50$                                        | Zwitterion, Anion                     | Zwitterion, Anion               |
|               | Sulfamerazine    | SM      | $C_{11}H_{12}N_4O_2S$ |    | 264.30         | 0.44         | $pK_{a1}=2.06$<br>$pK_{a2}=6.90$                   | -                                     | -                               |
| Sulfonamides  | Sulfamethazine   | SMT     | $C_{12}H_{14}N_4O_2S$ |  | 278.34         | 0.14         | $pK_{a1}=2.65$<br>$pK_{a2}=7.65$                   | Molecule, Anion                       | Molecule, Anion                 |
|               | Sulfamethoxazole | SMX     | $C_{10}H_{11}N_3O_3S$ |  | 253.28         | 0.89         | $pK_{a1}=1.70$<br>$pK_{a2}=5.70$                   | Molecule, Anion                       | Anion                           |
|               | Sulfathiazole    | ST      | $C_9H_9N_3O_2S$       |  | 255.32         | 0.35         | $pK_{a1}=2.20$<br>$pK_{a2}=7.24$                   | -                                     | -                               |
|               | Sulfapyridine    | SP      | $C_{11}H_{11}N_3O_2S$ |  | 249.29         | -1.37        | $pK_{a1}=2.90$<br>$pK_{a2}=8.54$                   | -                                     | -                               |

| Class            | Compound      | Acronym | Molecular formula                                                                 | Structure | Molecular mass | Log K <sub>ow</sub> | pK <sub>a</sub>                                  | Speciation at freshwater (pH=6.7-7.1) | Speciation at seawater (pH=8.0) |
|------------------|---------------|---------|-----------------------------------------------------------------------------------|-----------|----------------|---------------------|--------------------------------------------------|---------------------------------------|---------------------------------|
| Fluoroquinolones | Norfloxacin   | NFC     | C <sub>16</sub> H <sub>18</sub> FN <sub>3</sub> O <sub>3</sub>                    |           | 319.33         | -0.46               | pK <sub>a1</sub> =3.11<br>pK <sub>a2</sub> =6.10 | -                                     | -                               |
|                  | Enrofloxacin  | EFC     | C <sub>19</sub> H <sub>22</sub> FN <sub>3</sub> O <sub>3</sub>                    |           | 359.40         | 0.70                | pK <sub>a1</sub> =3.85<br>pK <sub>a2</sub> =6.19 | -                                     | -                               |
| Fluoroquinolones | Ciprofloxacin | CIP     | C <sub>17</sub> H <sub>18</sub> FN <sub>3</sub> O <sub>3</sub>                    |           | 331.34         | 1.32                | pK <sub>a1</sub> =6.20<br>pK <sub>a2</sub> =8.80 | Zwitterion, Cation, Anion             | Zwitterion, Anion               |
|                  | Ofloxacin     | OFC     | C <sub>18</sub> H <sub>20</sub> FN <sub>3</sub> O <sub>4</sub>                    |           | 361.37         | -0.02               | -                                                | -                                     | -                               |
| Macrolides       | Erythromycin  | ETM     | C <sub>37</sub> H <sub>67</sub> NO <sub>13</sub>                                  |           | 733.945        | 3.06                | pK <sub>a</sub> =8.90                            | -                                     | -                               |
|                  | Roxithromycin | RTM     | C <sub>41</sub> H <sub>76</sub> N <sub>2</sub> O <sub>15</sub>                    |           | 837.05         | 2.75                | pK <sub>a</sub> =9.17                            | -                                     | -                               |
| Other            | Trimethoprim  | TMP     | C <sub>14</sub> H <sub>18</sub> N <sub>4</sub> O <sub>3</sub>                     |           | 209.30         | 0.91                | pK <sub>a1</sub> =3.20<br>pK <sub>a2</sub> =6.80 | Zwitterion, Anion                     | Zwitterion, Anion               |
|                  | Amoxicillin   | AMX     | C <sub>16</sub> H <sub>19</sub> N <sub>3</sub> O <sub>5</sub> S·3H <sub>2</sub> O |           | 419.46         | 0.87                | pK <sub>a</sub> =7.40                            | Zwitterion, Anion                     | Zwitterion, Anion               |

Notes: (1) "-" Indicates lack of relevant information.

**Table S4.** Concentrations of major antibiotics in rivers, oceans, and lakes in China (µg/L).

| Study area                           | Tetracyclines | Sulfonamides | Fluoroquinolones | Macrolides | Reference |
|--------------------------------------|---------------|--------------|------------------|------------|-----------|
| Major rivers in Chongqing            | 25.7          | 8.6          | -                | 26.6       | [32]      |
| The Yellow River and its tributaries | -             | 44.0         | -                | 53.0       | [33]      |
| Laizhou Bay, Shandong Province       | -             | 77.3         | 355.5            | 127.3      | [34]      |
| Jiulong River in South China         | 11.2–1447.0   | 0.6–1083.2   | -                | -          | [35]      |
| Bohai Bay                            | 109.0         | 127.0        | 960.0            | 107.0      | [36]      |
| Daliao River                         | 152.0         | 57.0         | 453.0            | 169.0      | [37]      |
| Haihe River Basin                    | 67 ± 5.0      | 450 ± 29.0   | 280.0 ± 130.0    | 61 + 25.0  | [38]      |
| Beibu Gulf (Maoling River)           | -             | 3.1          | -                | 3.8        | [39]      |
| Beibu Gulf (Qinjiang River)          | -             | 13.6         | -                | 22         |           |
| Beibu Gulf (Jingu River)             | -             | 10.2         | -                | 12         |           |
| Beibu Gulf (Dafeng River)            | -             | 2.8          | -                | 10         |           |
| Qinghe, Beijing                      | 851.8         | 293.2        | 9281.7           | -          | [40]      |
| Xiaoqing River                       | -             | 166.4        | 177.5            | 60.0       | [41]      |
| Chaohu Lake                          | 55.5          | -            | 65.4             | -          | [42]      |
| Fuxian Lake                          | 0.12          | 6.6          | 3.4              | 2.3        | [43]      |
| Baiyangdian                          |               | 383.3        | 60.2             | 47.1       | [44]      |
| Datong Lake                          | 6.3           | 49.8         | 18.2             |            | [45]      |
| The Huangpu River                    | 62.7          | 20.7         | -                | 0.9        | [46]      |
| The East China Sea                   | 2.5           | 39.3         | 54.2             | 33.6       | [47]      |
| Victoria Bay                         | 14.4          | 1.0          | 11.5             | 7.9        | [48]      |
| Southern Yellow Sea                  | -             | 16.9         | 36.6             | 11.0       | [49]      |
| Pearl River                          | -             | 527.0        | 222.0            | 522.0      | [50]      |
| Taihu Lake                           | 155.3         | 430.1        | 45.3             | 159.8      | [51]      |
| Songhua River                        | -             | 2.1–91.2     | 0.03–8.1         | 0.26–18.1  | [52]      |
| Lancang River                        | ND~12.2       | 1.51~37.4    | 0.03~1.5         | 0.18~4.5   | [53]      |
| Yarlung zangbo River                 | 0.7~14.1      | 2.7~33.9     | <2               | 0.6~33.8   | [53]      |
| Yangtze river (Nanjing section)      | 14.6          | 32.4         | 27.3             | 778.5      | [54]      |



| Study area                                                    | Tetracyclines | Sulfonamides | Fluoroquinolones | Macrolides | Reference |
|---------------------------------------------------------------|---------------|--------------|------------------|------------|-----------|
| Moon lake<br>(Ningbo)                                         | -             | 13.7–523.8   | ND-267.0         | 5.9–552.5  | [55]      |
| Taihu lake basin<br>(Yili-<br>Taohang section)                | ND~17.9       | ND~0.6       | ND~0.21          | 0.04~0.94  | [56]      |
| Changzhou-Wuxi<br>Taihu gonghu bay<br>Wuxi                    | ND~4720.0     | ND~478.0     | 14.0~474.0       | 14~23.0    | [57]      |
| Tiaoxi (taihu lake<br>basin)<br>Huzhou                        | ND            | ≤ 326.6      | ≤ 36.5           | -          | [58]      |
| Poyang Lake<br>Nanchang                                       | ND~106.5      | 1.3~117.0    | -                | 3.6~14.8   | [59]      |
| Chaohu<br>Hefei                                               | ND~14.0       | ND~189.9     | ND~148.7         | ND~18.5    | [60]      |
| South lake<br>Wuhan                                           | 21.4~43.4     | 3.5~20.5     | 70.7~155.5       | -          | [61]      |
| Shahu<br>wuhan                                                | 20.1~29.0     | ND~0.8       | 37.8~75.1        | -          | [61]      |
| East lake<br>Wuhan                                            | 15.4~24.6     | ND~4.2       | 49.5~83.3        | -          | [61]      |
| Datong lake<br>Yiyang                                         | ND~18.1       | 11.6~181.3   | ND~83.5          | -          | [51]      |
| Yangtze river basin<br>(three gorges<br>Section)<br>Chongqing | -             | ND~247.0     | ND~16.4          | 19.1~223.7 | [62]      |
| Nanming river<br>(Guiyang)                                    | 0.4~243.3     | 13.7~523.8   | 1.7~424.4        | 5.9~552.5  | [63]      |
| Weihe river (Xi'an)                                           | 4.6~129.9     | 21.4~60.0    | 4.7~64.3         | -          | [64]      |
| Pearl river<br>(Guangzhou)                                    | 643.2         | 687.9        | 814.1            | 1112.2     | [65]      |
| Star lake<br>Zhaoqing                                         | ND            | 9.3~190.7    | 2.3~9.5          | ND~0.8     | [66]      |
| Caohai karst<br>plateau wetland<br>Weining                    | ND            | 50.5         | 43.2             | 22.6       | [67]      |
| Huaihe (Shihe<br>district)<br>Xinyang                         | ND~275.1      | -            | -                | 13.1~355.6 | [67]      |
| Ebinur Lake                                                   | ND~15.9       | 22.5~103.7   | 21.6~83.8        | 0.6~306.8  | [68]      |

| Study area                                                                                                             | Tetracyclines | Sulfonamides | Fluoroquinolones | Macrolides | Reference |
|------------------------------------------------------------------------------------------------------------------------|---------------|--------------|------------------|------------|-----------|
| Bortala Mongolian autonomous prefecture Bosten Lake Bayingoleng Mongolian autonomous prefecture Ebinur lake Alashankou | ND~43.6       | ND~36.8      | ND~99.3          | -          | [69]      |
|                                                                                                                        | ND~12.0       | ND~61.0      | 293.8~5145.0     | -          | [70]      |

Note: (1) “ND” means not detected/below quantification limit. (2) “-” indicates that the item is not covered in the literature.

**Table S5.** Concentration of Antibiotics in Sediments of China (µg/kg).

| Study area                                                       | Tetracyclines | Sulfonamides | Fluoroquinolones | Macrolides  | Reference |
|------------------------------------------------------------------|---------------|--------------|------------------|-------------|-----------|
| Hanjiang River (Shaanxi Province, Hubei Province)                | ND-8.6        | ND-3.3       | ND-28237.52      | -           | [71]      |
| Haihe River (Beijing-Tianjin-Hebei region)                       | ND-33100      | ND-12384.4   | ND-34850         | ND-5676.8   | [72]      |
| Liao River (Jilin Province)                                      | ND-512        | ND-6.1       | ND-640           | ND-78.8     | [73]      |
| Pearl river estuary (Zhuhai)                                     | ND-96.75      | ND-96.9      | ND-258.2         | ND-59.2     | [74]      |
| Pearl river estuary (Guangzhou)                                  | 0.99–7.13     | 0.78–3.24    | 1.03–13.83       | 6.07–13.5   | [75]      |
| Taihu lake                                                       | 0.010–0.902   | 0.002–0.150  | -                | 0.005–1.532 | [76]      |
| East China sea bay (Zhejiang Province)                           | 0.0–1.8       | 0.0–25.3     | -                | 0.6–60.3    | [47]      |
| Yellow River (Gansu Province, Henan Province, Shandong Province) | ND-202.0      | ND-22.0      | -                | ND-56.6     | [77]      |
| Yellow River (Shanxi Province)                                   | 6.15          | 14.23        | 5.43             | 10.07       | [27]      |
| Huangpu River                                                    | 0.6–40.3      | 0.35–5.41    | ND-21.3          | 1.8–28.7    | [78]      |
| Baiyangdian Lake                                                 | -             | ND-29.07     | 49.4–1567.69     | ND-305.04   | [44]      |
| Dianchi Lake                                                     | ND-207.1      | -            | ND-239.9         | -           | [79]      |
| Dongting Lake                                                    | -             | ND-8.57      | ND-8.07          | -           | [51]      |
| Hong Lake                                                        | -             | 0.81–101.86  | 6.18–319.29      | -           | [51]      |
| Bosten Lake                                                      | 11.88–59.65   | ND-5.71      | 42.99–370.43     | 8.3–29.76   | [51]      |

| Study area  | Tetracyclines | Sulfonamides | Fluoroquinolones | Macrolides | Reference |
|-------------|---------------|--------------|------------------|------------|-----------|
| Hongze Lake | 1.35–25.43    | -            | -                | -          | [80]      |

Note: (1) “ND” means not detected/below quantification limit. (2) “-” indicates that the item is not covered in the literature.

## References

1. Zhang, W.W.; Zhang, S.F.; Wang, J.Y.; Wang, Y.; Mu, J.L.; Wang, P.; Lin, X.Z.; Ma, D.Y. Microplastic pollution in the surface waters of the Bohai Sea, China. *Environ. Pollut.* **2017**, *231*, 541–548, doi:10.1016/j.envpol.2017.08.058.
2. Cai, M.G.; He, H.X.; Liu, M.Y.; Li, S.W.; Tang, G.W.; Wang, W.M.; Huang, P.; Wei, G.; Lin, Y.; Chen, B.; et al. Lost but can't be neglected: Huge quantities of small microplastics hide in the South China Sea. *Sci. Total Environ.* **2018**, *633*, 1206–1216, doi:10.1016/j.scitotenv.2018.03.197.
3. Zhu, L.; Bai, H.Y.; Chen, B.J.; Sun, X.M.; Qu, K.M.; Xia, B. Microplastic pollution in North Yellow Sea, China: Observations on occurrence, distribution and identification. *Sci. Total Environ.* **2018**, *636*, 20–29, doi:10.1016/j.scitotenv.2018.04.182.
4. Zhang, C.F.; Zhou, H.H.; Cui, Y.Z.; Wang, C.S.; Li, Y.H.; Zhang, D.D. Microplastics in offshore sediment in the Yellow Sea and East China Sea, China. *Environ. Pollut.* **2019**, *244*, 827–833, doi:10.1016/j.envpol.2018.10.102.
5. Wang, W.F.; Yuan, W.K.; Chen, Y.L.; Wang, J. Microplastics in surface waters of Dongting Lake and Hong Lake, China. *Sci. Total Environ.* **2018**, *633*, 539–545, doi:10.1016/j.scitotenv.2018.03.211.
6. Di, M.X.; Wang, J. Microplastics in surface waters and sediments of the Three Gorges Reservoir, China. *Sci. Total Environ.* **2018**, *616*, 1620–1627, doi:10.1016/j.scitotenv.2017.10.150.
7. Peng, G.Y.; Zhu, B.S.; Yang, D.Q.; Su, L.; Shi, H.H.; Li, D.J. Microplastics in sediments of the Changjiang Estuary, China. *Environ. Pollut.* **2017**, *225*, 283–290, doi:10.1016/j.envpol.2016.12.064.
8. Su, L.; Cai, H.W.; Kolandhasamy, P.; Wu, C.X.; Rochman, C.M.; Shi, H.H. Using the Asian clam as an indicator of microplastic pollution in freshwater ecosystems. *Environ. Pollut.* **2018**, *234*, 347–355, doi:10.1016/j.envpol.2017.11.075.
9. Xiong, X.; Zhang, K.; Chen, X.C.; Shi, H.H.; Luo, Z.; Wu, C.X. Sources and distribution of microplastics in China's largest inland lake - Qinghai Lake. *Environ. Pollut.* **2018**, *235*, 899–906, doi:10.1016/j.envpol.2017.12.081.
10. Chen, S.Y. The Aging Process of Microplastics and Its Influence on the Sorption of Pollutants. Master's Thesis, Anhui University of Technology, Ma'anshan, China, 2020. (In Chinese)
11. Wang, W.F.; Ndungu, A.W.; Li, Z.; Wang, J. Microplastics pollution in inland freshwaters of China: A case study in urban surface waters of Wuhan, China. *Sci. Total Environ.* **2017**, *575*, 1369–1374, doi:10.1016/j.scitotenv.2016.09.213.
12. Zhao, S.Y.; Zhu, L.X.; Wang, T.; Li, D.J. Suspended microplastics in the surface water of the Yangtze Estuary System, China: First observations on occurrence, distribution. *Mar. Pollut. Bull.* **2014**, *86*, 562–568, doi:10.1016/j.marpolbul.2014.06.032.
13. Lin, L.; Zuo, L.Z.; Peng, J.P.; Cai, L.Q.; Fok, L.; Yan, Y.; Li, H.X.; Xu, X.R. Occurrence and distribution of microplastics in an urban river: A case study in the Pearl River along Guangzhou City, China. *Sci. Total Environ.* **2018**, *644*, 375–381, doi:10.1016/j.scitotenv.2018.06.327.
14. Zhao, S.Y.; Zhu, L.X.; Li, D.J. Microplastic in three urban estuaries, China. *Environ. Pollut.* **2015**, *206*, 597–604, doi:10.1016/j.envpol.2015.08.027.
15. Zhang, K.; Su, J.; Xiong, X.; Wu, X.; Wu, C.X.; Liu, J.T. Microplastic pollution of lakeshore sediments from remote lakes in Tibet plateau, China. *Environ. Pollut.* **2016**, *219*, 450–455, doi:10.1016/j.envpol.2016.05.048.
16. Qiu, Q.X.; Peng, J.P.; Yu, X.B.; Chen, F.C.Z.; Wang, J.D.; Dong, F.Q. Occurrence of microplastics in the coastal marine environment: First observation on sediment of China. *Mar. Pollut. Bull.* **2015**, *98*, 274–280, doi:10.1016/j.marpolbul.2015.07.028.
17. Mao, Y.F.; Li, H.; Gu, W.K.; Yang, G.F.; Liu, Y.; He, Q. Distribution and characteristics of microplastics in the Yulin River, China: Role of environmental and spatial factors. *Environ. Pollut.* **2020**, *265*, 9, doi:10.1016/j.envpol.2020.115033.
18. Feng, S.S.; Lu, H.W.; Yao, T.C.; Xue, Y.X.; Yin, C.; Tang, M. Spatial characteristics of microplastics in the high-altitude area

- on the Tibetan Plateau. *J. Hazard. Mater.* **2021**, *417*, 9, doi:10.1016/j.jhazmat.2021.126034.
19. Jiang, C.B.; Yin, L.S.; Li, Z.W.; Wen, X.F.; Luo, X.; Hu, S.P.; Yang, H.Y.; Long, Y.N.; Deng, B.; Huang, L.Z.; et al. Microplastic pollution in the rivers of the Tibet Plateau. *Environ. Pollut.* **2019**, *249*, 91–98, doi:10.1016/j.envpol.2019.03.022.
  20. Xu, Y.Y.; Chan, F.K.S.; Johnson, M.; Stanton, T.; He, J.; Jia, T.; Wang, J.; Wang, Z.L.; Yao, Y.T.; Yang, J.T.; et al. Microplastic pollution in Chinese urban rivers: The influence of urban factors. *Resour. Conserv. Recycl.* **2021**, *173*, 11, doi:10.1016/j.resconrec.2021.105686.
  21. Zhang, K.; Xiong, X.; Hu, H.J.; Wu, C.X.; Bi, Y.H.; Wu, Y.H.; Zhou, B.S.; Lam, P.K.S.; Liu, J.T. Occurrence and Characteristics of Microplastic Pollution in Xiangxi Bay of Three Gorges Reservoir, China. *Environ. Sci. Technol.* **2017**, *51*, 3794–3801, doi:10.1021/acs.est.7b00369.
  22. Li, J.L.; Ouyang, Z.Z.; Liu, P.; Zhao, X.N.; Wu, R.R.; Zhang, C.T.; Lin, C.; Li, Y.Y.; Guo, X.T. Distribution and characteristics of microplastics in the basin of Chishui River in Renhuai, China. *Sci. Total Environ.* **2021**, *773*, 7, doi:10.1016/j.scitotenv.2021.145591.
  23. Zhang, Q.J.; Liu, T.; Liu, L.; Fan, Y.F.; Rao, W.X.; Zheng, J.L.; Qian, X. Distribution and sedimentation of microplastics in Taihu Lake. *Sci. Total Environ.* **2021**, *795*, 11, doi:10.1016/j.scitotenv.2021.148745.
  24. Yuan, W.K.; Liu, X.N.; Wang, W.F.; Di, M.X.; Wang, J. Microplastic abundance, distribution and composition in water, sediments, and wild fish from Poyang Lake, China. *Ecotox. Environ. Safe.* **2019**, *170*, 180–187, doi:10.1016/j.ecoenv.2018.11.126.
  25. Mao, R.F.; Hu, Y.Y.; Zhang, S.Y.; Wu, R.R.; Guo, X.T. Microplastics in the surface water of Wuliangsu Lake, northern China. *Sci. Total Environ.* **2020**, *723*, 7, doi:10.1016/j.scitotenv.2020.137820.
  26. Wang, X. The Distribution Characteristics, Source and Flux of Microplastics from Daliao River into the Sea. Master's Thesis, Dalian Maritime University, Dalian, China, **2021**. (In Chinese)
  27. Wang, L.F.; Li, H.; Dang, J.H.; Guo, H.; Zhu, Y.E.; Han, W.H. Occurrence, distribution, and partitioning of antibiotics in surface water and sediment in a typical tributary of Yellow River, China. *Environ. Sci. Pollut. Res.* **2021**, *28*, 28207–28221, doi:10.1007/s11356-021-12634-1.
  28. Niu, X.Y. Study on the Occurrence Characteristics of Microplastics in the Surface Water of the Yellow River Estuary. Master's Thesis, Shandong Normal University, Jinan, China, **2020**. (In Chinese)
  29. Lv, Y.N. Study on Microplastic Pollution in Water and Sediment System of Ganjiang River. Master's Thesis, Qufu Normal University, Qufu, China, **2020**. (In Chinese)
  30. Hu, Y. Carbon Nanotubes Synthesized from Microplastics in the Chin Ling-Weihe River Transition Zone by Catalytic Pyrolysis. Master's Thesis, Northwest Agricultural and Forestry University, Xi'an, China, **2021**. (In Chinese)
  31. Li, Y.D. Occurrence Characteristics, Source Apportionment and Environmental Influencing Factors of Microplastics in the Urban Rivers of Harbin. Master's Thesis, Harbin Normal University, Harbin, China, **2022**. (In Chinese)
  32. Wang, G.G.; Zhou, S.H.; Han, X.K.; Zhang, L.L.; Ding, S.Y.; Li, Y.; Zhang, D.J.; Zarin, K. Occurrence, distribution, and source track of antibiotics and antibiotic resistance genes in the main rivers of Chongqing city, southwest China. *J. Hazard. Mater.* **2020**, *389*, 13, doi:10.1016/j.jhazmat.2020.122110.
  33. Xu, W.H.; Zhang, G.; Zou, S.C.; Ling, Z.H.; Wang, G.L.; Yan, W. A Preliminary Investigation on the Occurrence and Distribution of Antibiotics in the Yellow River and its Tributaries, China. *Water Environ. Res.* **2009**, *81*, 248–254, doi:10.2175/106143008x325719.
  34. Zhang, R.J.; Zhang, G.; Zheng, Q.; Tang, J.H.; Chen, Y.J.; Xu, W.H.; Zou, Y.D.; Chen, X.X. Occurrence and risks of antibiotics in the Laizhou Bay, China: Impacts of river discharge. *Ecotox. Environ. Safe.* **2012**, *80*, 208–215, doi:10.1016/j.ecoenv.2012.03.002.
  35. Zhang, D.D.; Lin, L.F.; Luo, Z.X.; Yan, C.Z.; Zhang, X. Occurrence of selected antibiotics in Jiulongjiang River in various seasons, South China. *J. Environ. Monit.* **2011**, *13*, 1953–1960, doi:10.1039/c0em00765j.

36. Zou, S.C.; Xu, W.H.; Zhang, R.J.; Tang, J.H.; Chen, Y.J.; Zhang, G. Occurrence and distribution of antibiotics in coastal water of the Bohai Bay, China: Impacts of river discharge and aquaculture activities. *Environ. Pollut.* **2011**, *159*, 2913–2920, doi:10.1016/j.envpol.2011.04.037.
37. Qin, Y.W.; Zhang, L.; Shi, Y.; Ma, Y.Q.; Chang, X.; Liu, Z.C. Contamination Characteristics and Ecological Risk Assessment of Typical Antibiotics in Surface Water of the Daliao River, China. *Res. Environ. Sci.* **2015**, *28*, 361–368. (In Chinese)
38. Luo, Y.; Xu, L.; Rysz, M.; Wang, Y.Q.; Zhang, H.; Alvarez, P.J.J. Occurrence and Transport of Tetracycline, Sulfonamide, Quinolone, and Macrolide Antibiotics in the Haihe River Basin, China. *Environ. Sci. Technol.* **2011**, *45*, 1827–1833, doi:10.1021/es104009s.
39. Zheng, Q.; Zhang, R.J.; Wang, Y.H.; Pan, X.H.; Tang, J.H.; Zhang, G. Occurrence and distribution of antibiotics in the Beibu Gulf, China: Impacts of river discharge and aquaculture activities. *Mar. Environ. Res.* **2012**, *78*, 26–33, doi:10.1016/j.marenvres.2012.03.007.
40. Gao, L.; Li, X.; Zhang, Y.; Wei, Y.M.; Li, W.; Feng, Z. Research on pollution characteristics of antibiotics in Qinghe River in Beijing. *Ecol. Sci.* **2014**, *33*, 83–92. (In Chinese)
41. Li, J.; Zhang, R.J.; Wang, R.M.; Zhang, H.; Jiang, D.J.; Zou, T.; Tang, J.H.; Lv, J. Distribution characteristics and ecological risk assessment of antibiotic pollution in Xiaoqing River watershed. *J. Agro-Environ. Sci.* **2016**, *35*, 1384–1391. (In Chinese)
42. Tang, J.; Chen, H.Y.; Shi, T.Z.; Li, X.D.; Hua, R.M.; Chen, Y. Current Status and Source Analysis of Quinolone and Tetracycline Drug Pollution in Chaohu Lake. *J. Anhui Agric. Univ.* **2013**, *40*, 1043–1048, doi:10.13610/j.cnki.1672-352x.2013.06.006.
43. Zhao, B.; Xu, J.M.; Zhang, G.D.; Lu, S.Y.; Liu, X.H.; Li, L.X.; Li, M. Occurrence of antibiotics and antibiotic resistance genes in the Fuxian Lake and antibiotic source analysis based on principal component analysis-multiple linear regression model. *Chemosphere* **2021**, *262*, 11, doi:10.1016/j.chemosphere.2020.127741.
44. Li, W.; Shi, Y.; Gao, L.; Liu, J.; Cai, Y. Occurrence of antibiotics in water, sediments, aquatic plants, and animals from Baiyangdian Lake in North China. *Chemosphere* **2012**, *89*, 1307–1315, doi:https://doi.org/10.1016/j.chemosphere.2012.05.079.
45. Liu, X.H.; Lu, S.Y. Occurrence and ecological risk of typical antibiotics in surface water of the Datong Lake, China. *China Environ. Sci.* **2018**, *38*, 320–329. https://doi.org/10.19674/j.cnki.issn1000-6923.2018.0038. (In Chinese)
46. Jiang, L.; Hu, X.L.; Yin, D.Q.; Zhang, H.C.; Yu, Z.Y. Occurrence, distribution and seasonal variation of antibiotics in the Huangpu River, Shanghai, China. *Chemosphere* **2011**, *82*, 822–828, doi:10.1016/j.chemosphere.2010.11.028.
47. Li, F.F.; Chen, L.J.; Chen, W.D.; Bao, Y.Y.; Zheng, Y.H.; Huang, B.; Mu, Q.L.; Wen, D.H.; Feng, C.P. Antibiotics in coastal water and sediments of the East China Sea: Distribution, ecological risk assessment and indicators screening. *Mar. Pollut. Bull.* **2020**, *151*, 11, doi:10.1016/j.marpolbul.2019.110810.
48. Minh, T.B.; Leung, H.W.; Loi, I.H.; Chan, W.H.; So, M.K.; Mao, J.Q.; Choi, D.; Lam, J.C.W.; Zheng, G.; Martin, M.; et al. Antibiotics in the Hong Kong metropolitan area: Ubiquitous distribution and fate in Victoria Harbour. *Mar. Pollut. Bull.* **2009**, *58*, 1052–1062, doi:10.1016/j.marpolbul.2009.02.004.
49. Du, J.; Zhao, H.; Liu, S.; Xie, H.; Wang, Y.; Chen, J. Antibiotics in the coastal water of the South Yellow Sea in China: Occurrence, distribution and ecological risks. *Sci. Total Environ.* **2017**, *595*, 521–527, doi:https://doi.org/10.1016/j.scitotenv.2017.03.281.
50. Xu, W.H.; Zhang, G.; Zou, S.C.; Li, X.D.; Liu, Y.C. Determination of selected antibiotics in the Victoria Harbour and the Pearl River, South China using high-performance liquid chromatography-electrospray ionization tandem mass spectrometry. *Environ. Pollut.* **2007**, *145*, 672–679, doi:10.1016/j.envpol.2006.05.038.
51. Liu, X.H.; Lu, S.Y.; Guo, W.; Xi, B.D.; Wang, W.L. Antibiotics in the aquatic environments: A review of lakes, China. *Sci. Total Environ.* **2018**, *627*, 1195–1208, doi:10.1016/j.scitotenv.2018.01.271.
52. Wang, W.H.; Zhang, W.F.; Liang, H.; Gao, D.W. Seasonal distribution characteristics and health risk assessment of typical antibiotics in the Harbin section of the Songhua River basin. *Environ. Technol.* **2019**, *40*, 2726–2737,

doi:10.1080/09593330.2018.1449902.

53. Liang, S. Distribution Characteristics and Risk Assessment of Antibiotics in Lancang and Yarlung Zangbo Rivers. Master's Thesis, China University of Geosciences (Beijing): Beijing, China, **2019**. (In Chinese)
54. Feng, M.J.; Zhang, Y.; Song, N.H.; Bu, Y.Q.; Yang, Z.B.; Liu, Y.H.; Guo, R.X.; Chen, J.Q.; Zhang, S.H. Occurrence Characteristics and Risk Assessment of Antibiotics in Source Water of the Nanjing Reach of the Yangtze River. *Chin. J. Environ. Sci.* **2019**, *40*, 5286–5293. (In Chinese)
55. Wang, R.J.; QiuQian, L.L.; Li, G.X.; Zong, Y.N.; Tang, J.F.; Xu, Y.Y. Distribution characteristics and ecological risk assessment of selected antibiotics in Moon Lake, Ningbo City. *J. Lake Sci.* **2018**, *30*, 1616–1624. (In Chinese)
56. Sun, Q.G.; Wang, Z.Y.; Dong, J.W.; Chen, C.; Chen, Q.W.; Liu, J.J.; Shi, F.Y. Spatial-temporal distribution and risk evaluation of four typical antibiotics in river networks of Taihu Lake Basin. *Acta Sci. Circumst.* **2018**, *38*, 4400–4410. (In Chinese)
57. Xu, L.; Ye, X.P.; Hao, G.J.; Sheng, P.C.; Zhou, D.R.; Sun, B.Z.; Zhang, H.Q. Typical Antibiotic Pollution Characteristics and Ecological Risk Assessment of Surface Water in Tiaoxi River. *Mod. Agric. Sci. Tech.* **2020**, *7*, 180–183+187. (In Chinese)
58. Xu, L.; Ye, X.P.; Hao, G.J.; Sheng, P.C.; Zhou, D.R.; Sun, B.Z.; Zhang, H.Q. Typical Antibiotic Pollution Characteristics and Ecological Risk Assessment of Surface Water in Tiaoxi River. *Mod. Agric. Sci. Tech.* **2020**, *7*, 180–183+187. (In Chinese)
59. Ding, H.J. Study on the Characteristics of Antibiotics in Poyang Lake and the Adsorption and Degradation of Typical Antibiotics. Ph.D. Thesis, Wuhan University, Wuhan, China, **2018**. (In Chinese)
60. Tang, J.; Shi, T.Z.; Wu, X.W.; Cao, H.Q.; Li, X.D.; Hua, R.M.; Tang, F.; Yue, Y.D. The occurrence and distribution of antibiotics in Lake Chaohu, China: Seasonal variation, potential source and risk assessment. *Chemosphere* **2015**, *122*, 154–161. <https://doi.org/10.1016/j.chemosphere.2014.11.032>.
61. Xiao, X.X.; Wu, Y.X.; Ding, H.J.; Wang, L.; Yang, W.F.; Zhang, J.W. Pollution Characteristics of Antibiotics and Antibiotic Resistance Genes in Urban Lakes of Wuhan. *Environ. Sci. Tech.* **2019**, *42*, 9–16. (In Chinese)
62. Feng, L.; Cheng, Y.R.; Feng, L.; Zhang, S.; Liu, Y.Q. Distribution of Typical Antibiotics and Ecological Risk Assessment in Main Waters of Three Gorges Reservoir Area. *Res. Environ. Sci.* **2017**, *30*, 1031–1040. (In Chinese)
63. Wang, Y.N.; Peng, J.; Huang, H.T.; Tan, H.; Zhang, A.H.; Yang, H.B.; Guo, F.; He, J.L. Distribution characteristics of typical antibiotics in Urban Rivers of Guiyang City. *Environ. Chem.* **2018**, *37*, 2039–2048. (In Chinese)
64. Wang, J.W.; Wei, H.; Yang, X.Y.; Sun, B.C.; Zhang, J.T. Occurrence and ecological risk of sulfonamide antibiotics in the surface water of the Weihe Xi'an section. *Environ. Chem.* **2017**, *36*, 2574–2583. (In Chinese)
65. Liu, M.S.; Zhou, Z.H.; Liu, Y.X.; Zhao, J.L.; Cai, Y.P. Distribution characteristics of antibiotics in the pearl river basin. *Guangzhou Chem. Ind.* **2017**, *45*, 159–162. (In Chinese)
66. Xie, C.S.; Yang, S.T.; Wei, Q.; Jiang, X.X.; Wang, Z.X.; Wu, X.G. Antibiotic pollution characteristics and risk assessment of Xinghu Lake in Zhaoqing. *J. Environ. Health* **2019**, *36*, 427–431. (In Chinese)
67. Wang, D.X.; Wang, Q.Q. Analysis on the Distribution of Antibiotics Pollution in the Water Environment of Weihe River Area in Huaihe River Basin. *Environ. Sci. Manag.* **2020**, *45*, 63–66. (In Chinese)
68. Wang, Y.Q. Distribution Characteristics of Typical Antibiotics, Antibiotic Resistance Genes and Microbial Community in Ebinur Lake Basin. Master's Thesis, Shandong Normal University, Jinan, China, **2020**. (In Chinese)
69. Yan, X.S. Distribution, Sources and Risk Evaluation of Typical Antibiotics in Xiaoqing River Basin. Master's Thesis, Shandong Normal University, Jinan, China, **2018**. (In Chinese)
70. Wang, Q.Q. Pollution Levels of Antibiotics from Aquatic Environment in Alashankou Region of Xinjiang and Surrounding Area. Master's Thesis, Shihezi University, Shihezi, China, **2016**. (In Chinese)
71. Hu, Y.; Yan, X.; Shen, Y.; Di, M.; Wang, J. Antibiotics in surface water and sediments from Hanjiang River, Central China: Occurrence, behavior and risk assessment. *Ecotox. Environ. Safe.* **2018**, *157*, 150–158, doi:<https://doi.org/10.1016/j.ecoenv.2018.03.083>.

72. Chen, H.; Jing, L.; Teng, Y.; Wang, J. Characterization of antibiotics in a large-scale river system of China: Occurrence pattern, spatiotemporal distribution and environmental risks. *Sci. Total Environ.* **2018**, *618*, 409–418, doi:<https://doi.org/10.1016/j.scitotenv.2017.11.054>.
73. Dong, D.M.; Zhang, L.W.; Liu, S.; Guo, Z.Y.; Hua, X.Y. Antibiotics in water and sediments from Liao River in Jilin Province, China: occurrence, distribution, and risk assessment. *Environ. Earth Sci.* **2016**, *75*, 10, doi:10.1007/s12665-016-6008-4.
74. Li, S.; Shi, W.Z.; Li, H.M.; Xu, N.; Zhang, R.J.; Chen, X.J.; Sun, W.L.; Wen, D.H.; He, S.L.; Pan, J.G.; et al. Antibiotics in water and sediments of rivers and coastal area of Zhuhai City, Pearl River estuary, south China. *Sci. Total Environ.* **2018**, *636*, 1009–1019, doi:10.1016/j.scitotenv.2018.04.358.
75. Liang, X.M.; Chen, B.W.; Nie, X.P.; Shi, Z.; Huang, X.P.; Li, X.D. The distribution and partitioning of common antibiotics in water and sediment of the Pearl River Estuary, South China. *Chemosphere* **2013**, *92*, 1410–1416, doi:10.1016/j.chemosphere.2013.03.044.
76. Xu, Z.A.; Li, T.; Bi, J.; Wang, C. Spatiotemporal heterogeneity of antibiotic pollution and ecological risk assessment in Taihu Lake Basin, China. *Sci. Total Environ.* **2018**, *643*, 12–20, doi:10.1016/j.scitotenv.2018.06.175.
77. Zhou, L.-J.; Ying, G.-G.; Zhao, J.-L.; Yang, J.-F.; Wang, L.; Yang, B.; Liu, S. Trends in the occurrence of human and veterinary antibiotics in the sediments of the Yellow River, Hai River and Liao River in northern China. *Environ. Pollut.* **2011**, *159*, 1877–1885, doi:<https://doi.org/10.1016/j.envpol.2011.03.034>.
78. Chen, K.; Zhou, J.L. Occurrence and behavior of antibiotics in water and sediments from the Huangpu River, Shanghai, China. *Chemosphere* **2014**, *95*, 604–612, doi:10.1016/j.chemosphere.2013.09.119.
79. Wei, Y.M.; Zhang, Y.; Xu, J.; Guo, C.S.; Li, L.; Fan, W.H. Simultaneous quantification of several classes of antibiotics in water, sediments, and fish muscles by liquid chromatography-tandem mass spectrometry. *Front. Env. Sci. Eng.* **2014**, *8*, 357–371, doi:10.1007/s11783-013-0580-6.
80. Luo, F.; Pan, G.; Li, L.; Zhang, J.; Wang, N.; Jiao, S.; Zhang, X. The distribution characteristics and potential risk of tetracycline, oxytetracycline and their corresponding genes pollution in sediment of Hongze Lake. *Journal of Agro-Environment Science* **2017**, *36*, 369–375.

**Disclaimer/Publisher's Note:** The statements, opinions and data contained in all publications are solely those of the individual author(s) and contributor(s) and not of MDPI and/or the editor(s). MDPI and/or the editor(s) disclaim responsibility for any injury to people or property resulting from any ideas, methods, instructions or products referred to in the content.
